# Supplementary material for: Weight development between age 5 and 10 years and its associations with dietary patterns at age 5 in the ABCD cohort
Source: Springer Nature journal article supplement (doi:10.1186/s12889-020-08559-y), 2020-04-01
Supplement: MOESM1 [file 17856764]

Additional file 1. Mean (SD) BMI z-scores per BMI category at age 5 and 10 years by ethnicity and SES in the ABCD study population (n=1 765).

|                           |               | Ethnicity (n=1 765) |                              |                   |                    |                  | SES (n= 1 759)        |                   |
|---------------------------|---------------|---------------------|------------------------------|-------------------|--------------------|------------------|-----------------------|-------------------|
|                           |               | Dutch<br>(n=1 399)  | African Surinamese<br>(n=78) | Turkish<br>(n=46) | Moroccan<br>(n=96) | Other<br>(n=146) | Low/middle<br>(n=557) | High<br>(n=1 202) |
| <b>BMI category</b>       |               |                     |                              |                   |                    |                  |                       |                   |
| Underweight, n (%)        | <b>Age 5</b>  | -1.36 (0.39)        | -1.44 (0.46)                 | -1.74 (0.69)      | -1.57 (0.42)       | -1.47 (0.36)     | -1.44 (0.05)          | -1.35 (0.34)      |
|                           | <b>Age 10</b> | -1.20 (0.82)        | -0.88 (1.09)                 | -1.47 (0.33)      | -0.82 (0.91)       | -1.04 (0.90)     | -0.99 (1.00)          | -1.25 (0.74)      |
| Normal weight, n (%)      | <b>Age 5</b>  | 0.05 (0.57)         | 0.18 (0.70)                  | 0.29 (0.49)       | 0.29 (0.55)        | 0.04 (0.60)      | 0.14 (0.58)           | 0.04 (0.57)       |
|                           | <b>Age 10</b> | -0.04 (0.85)        | 0.51 (1.15)                  | 0.67 (1.06)       | 0.26 (0.92)        | 0.19 (0.88)      | 0.32 (0.96)           | 0.08 (0.83)       |
| Overweight/obesity, n (%) | <b>Age 5</b>  | 1.77 (0.49)         | 2.27 (0.72)                  | 1.91 (0.57)       | 2.14 (0.63)        | 1.68 (0.47)      | 2.02 (0.59)           | 1.64 (0.37)       |
|                           | <b>Age 10</b> | 1.44 (0.71)         | 1.98 (0.72)                  | 1.98 (0.57)       | 1.85 (0.63)        | 1.75 (0.76)      | 1.89 (0.66)           | 1.25 (0.61)       |

Ethnicity was based on the country of birth of the pregnant woman and her mother including both first-generation women and second generation women. SES was based on maternal education: low SES (<6y), middle SES (6-10y) and high SES (>10y) post-primary education. BMI categories were based on classification of Cole [7, 26] (n=1 765).
