# Supplementary material for: Weight development between age 5 and 10 years and its associations with dietary patterns at age 5 in the ABCD cohort
Source: Springer Nature journal article supplement (doi:10.1186/s12889-020-08559-y), 2020-04-01
Supplement: MOESM2 [file 17856764]

Additional file 2. Anthropometric characteristics at age 5 and 10 years by ethnicity, SES and sex in the ABCD study population (n=1 765).

|                               |               | Ethnicity (n=1 765) |                              |                    |                    |                    | SES (n= 1 759)        |                     |
|-------------------------------|---------------|---------------------|------------------------------|--------------------|--------------------|--------------------|-----------------------|---------------------|
|                               |               | Dutch<br>(n=1 399)  | African Surinamese<br>(n=78) | Turkish<br>(n=46)  | Moroccan<br>(n=96) | Other<br>(n=146)   | Low/middle<br>(n=557) | High<br>(n=1 202)   |
| <b>BMI, mean (SD)</b>         | <b>Age 5</b>  | <b>15.3 (1.3)</b>   | <b>15.9 (2.3)</b>            | <b>16.4 (1.7)</b>  | <b>16.4 (2.0)</b>  | <b>15.4 (1.4)</b>  | <b>15.8 (1.8)</b>     | <b>15.2 (1.2)</b>   |
|                               | Boys          | 15.3 (1.2)          | 16.2 (2.0)                   | 16.2 (1.4)         | 16.3 (2.0)         | 15.5 (1.5)         | 15.7 (1.7)            | 15.3 (1.1)          |
|                               | Girls         | 15.3 (1.4)          | 15.5 (2.6)                   | 16.6 (2.1)         | 16.5 (2.2)         | 15.4 (1.3)         | 15.8 (2.0)            | 15.2 (1.3)          |
|                               | <b>Age 10</b> | <b>17.0 (2.2)</b>   | <b>18.7 (3.8)</b>            | <b>19.5 (3.2)</b>  | <b>18.6 (3.2)</b>  | <b>17.7 (2.6)</b>  | <b>18.3 (3.2)</b>     | <b>16.7 (1.9)</b>   |
|                               | Boys          | 17.0 (2.0)          | 19.2 (3.6)                   | 19.6 (3.2)         | 18.4 (3.1)         | 17.7 (2.7)         | 18.1 (2.9)            | 16.9 (1.9)          |
|                               | Girls         | 17.0 (2.4)          | 18.2 (4.1)                   | 19.3 (3.2)         | 18.8 (3.3)         | 17.7 (2.5)         | 18.5 (3.4)            | 16.7 (2.0)          |
| <b>BMI z-score, mean (SD)</b> | <b>Age 5</b>  | <b>-0.04 (0.86)</b> | <b>0.23 (1.37)</b>           | <b>0.60 (0.99)</b> | <b>0.55 (1.67)</b> | <b>0.03 (0.93)</b> | <b>0.21 (1.11)</b>    | <b>-0.06 (0.81)</b> |
|                               | Boys          | -0.06 (0.87)        | 0.53 (1.31)                  | 0.56 (0.89)        | 0.54 (1.22)        | 0.05 (1.02)        | 0.20 (1.13)           | -0.05 (0.83)        |
|                               | Girls         | -0.02 (0.86)        | -0.06 (1.36)                 | 0.65 (1.16)        | 0.54 (1.11)        | 0.01 (0.86)        | 0.21 (1.09)           | -0.07 (0.79)        |
|                               | <b>Age 10</b> | <b>-0.11 (1.01)</b> | <b>0.49 (1.40)</b>           | <b>0.89 (1.20)</b> | <b>0.52 (1.16)</b> | <b>0.21 (1.08)</b> | <b>0.38 (1.22)</b>    | <b>-0.17 (0.96)</b> |
|                               | Boys          | -0.04 (1.01)        | 0.79 (1.35)                  | 1.00 (1.25)        | 0.53 (1.19)        | 0.27 (1.15)        | 0.39 (1.24)           | -0.06 (0.97)        |
|                               | Girls         | -0.17 (1.01)        | 0.20 (1.40)                  | 0.75 (1.16)        | 0.52 (1.15)        | 0.15 (1.02)        | 0.36 (1.20)           | -0.27 (0.93)        |
| <b>BMI category</b>           |               |                     |                              |                    |                    |                    |                       |                     |
| Underweight, n (%)            | <b>Age 5</b>  | <b>192 (13.8)</b>   | <b>17 (21.8)</b>             | <b>2 (4.4)</b>     | <b>9 (9.4)</b>     | <b>17 (11.6)</b>   | <b>81 (14.5)</b>      | <b>156 (13.0)</b>   |
|                               | Boys          | 99 (14.3)           | 6 (15.8)                     | 1 (3.7)            | 5 (9.3)            | 10 (14.9)          | 44 (15.2)             | 77 (13.1)           |
|                               | Girls         | 94 (13.3)           | 11 (27.5)                    | 1 (5.3)            | 4 (9.5)            | 7 (8.9)            | 37 (13.8)             | 79 (12.8)           |
|                               | <b>Age 10</b> | <b>183 (13.1)</b>   | <b>7 (9.0)</b>               | <b>4 (8.7)</b>     | <b>8 (8.3)</b>     | <b>14 (9.6)</b>    | <b>60 (10.8)</b>      | <b>156 (13.0)</b>   |
|                               | Boys          | 70 (10.1)           | 2 (5.3)                      | 3 (11.1)           | 5 (9.3)            | 6 (9.0)            | 29 (10.1)             | 57 (9.8)            |
|                               | Girls         | 113 (16.0)          | 5 (12.5)                     | 1 (5.3)            | 3 (7.2)            | 8 (10.1)           | 31 (11.6)             | 99 (16.1)           |
| Normal weight, n (%)          | <b>Age 5</b>  | <b>1 120 (80.0)</b> | <b>46 (59)</b>               | <b>33 (71.7)</b>   | <b>66 (68.8)</b>   | <b>114 (78.1)</b>  | <b>338 (69.7)</b>     | <b>986 (82.0)</b>   |
|                               | Boys          | 561 (81.2)          | 24 (63.2)                    | 22 (81.5)          | 38 (7.4)           | 51 (76.1)          | 205 (70.9)            | 489 (83.4)          |
|                               | Girls         | 558 (78.8)          | 22 (55.0)                    | 11 (57.9)          | 27 (64.3)          | 63 (79.7)          | 183 (68.3)            | 497 (80.7)          |

|                           |               |                     |                  |                  |                  |                   |                   |                   |
|---------------------------|---------------|---------------------|------------------|------------------|------------------|-------------------|-------------------|-------------------|
|                           | <b>Age 10</b> | <b>1 101 (78.7)</b> | <b>48 (61.5)</b> | <b>22 (47.8)</b> | <b>65 (67.7)</b> | <b>106 (72.6)</b> | <b>368 (66.0)</b> | <b>969 (80.6)</b> |
|                           | Boys          | 567 (82.1)          | 24 (63.2)        | 12 (44.4)        | 36 (66.7)        | 49 (73.1)         | 197 (68.2)        | 489 (83.4)        |
|                           | Girls         | 534 (75.4)          | 24 (60.0)        | 10 (52.6)        | 29 (69.0)        | 57 (72.2)         | 171 (63.8)        | 480 (77.9)        |
| Overweight/obesity, n (%) | <b>Age 5</b>  | <b>87 (6.2)</b>     | <b>15 (19.2)</b> | <b>11 (23.9)</b> | <b>21 (21.8)</b> | <b>15 (10.3)</b>  | <b>88 (15.8)</b>  | <b>60 (5.0)</b>   |
|                           | Boys          | 31 (4.5)            | 8 (21.1)         | 4 (14.8)         | 11 (20.4)        | 6 (9.0)           | 40 (13.8)         | 20 (3.4)          |
|                           | Girls         | 56 (7.9)            | 7 (17.5)         | 7 (36.8)         | 11 (26.2)        | 9 (11.4)          | 48 (17.9)         | 40 (6.5)          |
|                           | <b>Age 10</b> | <b>115 (8.2)</b>    | <b>23 (29.5)</b> | <b>20 (43.5)</b> | <b>23 (24.0)</b> | <b>26 (17.8)</b>  | <b>129 (23.2)</b> | <b>77 (6.4)</b>   |
|                           | Boys          | 54 (7.8)            | 12 (31.6)        | 12 (7.4)         | 13 (24.1)        | 12 (17.9)         | 63 (21.8)         | 40 (6.5)          |
|                           | Girls         | 61 (8.6)            | 11 (27.5)        | 8 (42.1)         | 10 (23.8)        | 14 (17.7)         | 66 (24.6)         | 37 (6.0)          |

Ethnicity was based on the country of birth of the pregnant woman and her mother including both first-generation women and second generation women. SES was based on maternal education: low SES (<6y), middle SES (6-10y) and high SES (>10y) post-primary education. BMI categories were based on classification of Cole [7, 26] (n=1 765).
